# Supplementary material for: Effect of Preadmission Metformin Use on Clinical Outcome of Acute Respiratory Distress Syndrome among Critically Ill Patients with Diabetes
Source: PubMed Central journal article supplement — Tuberc Respir Dis (Seoul). 2017 Jul 3;80(3):296–303. doi: 10.4046/trd.2017.80.3.296 (PMC5526958; doi:10.4046/trd.2017.80.3.296), 2017-07-03
Supplement: trd-80-296-s001.pdf [file trd-80-296-s001.pdf]

**Supplementary Table S1.** univariate logistic regression model with odds ratio for 30 days mortality (unmatched and propensity matched cohort)

|                           | Unmatched cohort |              |           | Propensity matched cohort |               |         |
|---------------------------|------------------|--------------|-----------|---------------------------|---------------|---------|
|                           | Odds ratio       | 95% CI       | p-value   | Odds ratio                | 95% CI        | p-value |
| Days before ICU admission | 0.99             | 0.97 to 1.01 | 0.29      | 0.98                      | 0.95 to 1.01  | 0.26    |
| BMI                       | 1.14             | 1.03 to 1.27 | 0.01      | 1.26                      | 1.05 to 1.50  | 0.01    |
| Hypertension              | 0.80             | 0.40 to 1.60 | 0.53      | 0.44                      | 0.16 to 1.20  | 0.11    |
| Cerebrovascular disease   | 0.36             | 0.14 to 0.90 | 0.03      | 0.46                      | 0.12 to 1.66  | 0.23    |
| Metastatic cancer         | 2.34             | 0.96 to 5.66 | 0.06      | 1.45                      | 0.47 to 4.53  | 0.52    |
| Chronic kidney disease    | 0.58             | 0.29 to 1.48 | 0.26      | 0.38                      | 0.09 to 1.64  | 0.20    |
| Immunosuppressed          | 3.11             | 1.34 to 7.21 | 0.01      | 4.35                      | 1.23 to 15.44 | 0.02    |
| HR at ICU admission       | 1.02             | 1.01 to 1.04 | 0.01      | 1.03                      | 1.07 to 1.06  | 0.01    |
| RR at ICU admission       | 1.04             | 0.99 to 1.10 | 0.13      | 1.04                      | 0.97 to 1.12  | 0.23    |
| pH                        | 0.37             | 0.02 to 7.51 | 0.52      | 0.03                      | 0.00 to 2.37  | 0.12    |
| HCO <sub>3</sub>          | 1.01             | 0.94 to 1.08 | 0.88      | 0.91                      | 0.79 to 1.04  | 0.15    |
| Hb                        | 1.18             | 0.98 to 1.42 | 0.09      | 1.39                      | 1.03 to 1.86  | 0.03    |
| Lactic acid               | 1.53             | 1.05 to 2.22 | 0.03      | 1.61                      | 1.06 to 2.44  | 0.03    |
| PEEP                      | 1.04             | 0.89 to 1.20 | 0.64      | 1.34                      | 1.05 to 1.72  | 0.02    |
| FiO <sub>2</sub>          | 1.02             | 1.00 to 1.03 | 0.09      | 1.02                      | 0.99 to 1.05  | 0.20    |
| Lung injury score         | 1.35             | 0.76 to 2.40 | 0.30      | 2.24                      | 0.89 to 5.63  | 0.09    |
| Metformin use             | 0.60             | 0.27 to 1.33 | 0.20      | 0.57                      | 0.21 to 1.53  | 0.27    |
| Hypoxemia index           |                  |              |           |                           |               |         |
| Mild                      |                  |              | Reference |                           |               |         |
| Moderate                  | 1.14             | 0.54 to 2.40 | 0.72      | 1.08                      | 0.39 to 3.04  | 0.88    |
| Severe                    | 0.50             | 0.15 to 1.68 | 0.26      | 0.50                      | 0.08 to 3.10  | 0.46    |
| Tidal volume >400 mL      | 0.99             | 0.48 to 2.04 | 0.97      | 1.08                      | 0.40 to 2.89  | 0.88    |
| APACHE II score           | 1.02             | 0.98 to 1.07 | 0.29      | 1.06                      | 0.99 to 1.12  | 0.07    |
| SOFA score                | 1.04             | 0.95 to 1.15 | 0.39      | 1.14                      | 1.00 to 1.31  | 0.06    |

CI: confidence interval; BMI: body mass index; HR: heart rate; ICU: intensive care unit; HCO<sub>3</sub>: bicarbonate; Hb: hemoglobin; PEEP: positive end expiratory pressure; FiO<sub>2</sub>: fraction of inspired oxygen; APACHE II score: Acute Physiology and Chronic Health Evaluation II score; SOFA score: Sequential Organ Failure Assessment score.
